# Supplementary material for: Plasma Exo-miRNAs Correlated with AD-Related Factors of Chinese Individuals Involved in Aβ Accumulation and Cognition Decline
Source: Research Square preprint supplement (doi:10.21203/rs.3.rs-1052464/v1), 2021-11-18
Supplement: Supplementary file 1 [file beb5708d35cc01522de09b3b.docx]

Supplemental Table 2 Differentially expressed miRNAs related to low BMI and AD
